# Supplementary material for: Imidazolium based ionic liquids in soils: effects of the side chain length on wheat (Triticum aestivum) and cress (Lepidium sativum) as affected by different clays and organic matter
Source: Royal Society of Chemistry journal article supplement (doi:10.1039/b717811e), 2008-01-01
Supplement: b717811e.pdf [file b717811e.pdf]

**Table 1:** Overview on the ANOVA - results performed for the factors mineral type and mineral concentrations as well as possible interactions of mineral type and concentration; statistics were performed using SPSS 12 and significant results are printed in bold; n.d. = not determined

|                                         | mineral type<br>(kaolinite or smectite) |                    | mineral concentration<br>(10 or 15 % clay) |                    | interaction mineral type and<br>mineral concentration |                    |
|-----------------------------------------|-----------------------------------------|--------------------|--------------------------------------------|--------------------|-------------------------------------------------------|--------------------|
|                                         | F                                       | P                  | F                                          | P                  | F                                                     | P                  |
| IM12 BF <sub>4</sub> 1000 mg/kg dw soil | 0.035                                   | 0.856              | 43.863                                     | <b>&lt; 0.0001</b> | 20.63                                                 | <b>0.001</b>       |
| IM12 BF <sub>4</sub> 500 mg/kg dw soil  | 210.885                                 | <b>&lt; 0.0001</b> | 5.750                                      | <b>0.037</b>       | 25.418                                                | <b>0.001</b>       |
| IM12 BF <sub>4</sub> 100 mg/kg dw soil  | 56.008                                  | <b>&lt; 0.0001</b> | 0.364                                      | 0.559              | 3.228                                                 | 0.103              |
| IM14 BF <sub>4</sub> 1000 mg/kg dw soil | 3.751                                   | <b>0.082</b>       | 4.477                                      | 0.06               | 0.53                                                  | 0.483              |
| IM14 BF <sub>4</sub> 500 mg/kg dw soil  | 9.826                                   | <b>0.011</b>       | 0.727                                      | 0.414              | 25.591                                                | <b>&lt; 0.0001</b> |
| IM14 BF <sub>4</sub> 100 mg/kg dw soil  | 2.887                                   | 0.12               | 13.704                                     | <b>0.004</b>       | 2.722                                                 | 0.130              |
| IM18 BF <sub>4</sub> 1000 mg/kg dw soil | 362.173                                 | <b>&lt; 0.0001</b> | 6.065                                      | <b>0.039</b>       | n.d.                                                  |                    |
| IM18 BF <sub>4</sub> 500 mg/kg dw soil  | 298.585                                 | <b>&lt; 0.0001</b> | 0.021                                      | 0.888              |                                                       |                    |
| IM18 BF <sub>4</sub> 100 mg/kg dw soil  | 0.937                                   | 0.361              | 0.321                                      | 0.592              |                                                       |                    |

**Table 2:** Overview on the ANOVA - results using the Bonferroni multiple comparisons (SPSS Version 12), comparison of the different clay mixture ratios for IM14 BF<sub>4</sub> in the growth inhibition assay with *Triticum aestivum*; total clay concentration of 10%; k = kaolinite, s = smectite; significant results are printed in bold.

|                                        | 100 mg IM14 BF <sub>4</sub> /kg dw soil | 500 mg IM14 BF <sub>4</sub> /kg dw soil | 1000 mg IM14 BF <sub>4</sub> /kg dw soil |
|----------------------------------------|-----------------------------------------|-----------------------------------------|------------------------------------------|
| Lufa versus 30 % K / 70 % S            | 0.264                                   | <b>0.02</b>                             | 0.134                                    |
| Lufa versus 50 % K / 50 % S            | 0.354                                   | <b>0.003</b>                            | <b>0.011</b>                             |
| Lufa versus 30 % K / 70 % S            | 1.000                                   | 0.129                                   | <b>0.028</b>                             |
| 30 % K / 70 % S versus 50 % K / 50 % S | 1.000                                   | 1.000                                   | 0.736                                    |
| 30 % K / 70 % S versus 70 % K / 30 % S | 1.000                                   | 1.000                                   | 1.000                                    |
| 50 % K / 50 % S versus 70 % K / 30 % S | 1.000                                   | 0.167                                   | 1.000                                    |

**Table 3:** Overview on the ANOVA - results using the Bonferroni multiple comparisons (SPSS Version 12), comparison of the different clay mixture ratios for IM18 BF<sub>4</sub> in the growth inhibition assay with *Triticum aestivum*; total clay concentration of 10%; k = kaolinite, s = smectite; significant results are printed in bold.

|                                        | 100 mg IM18 BF <sub>4</sub> /kg dw soil | 500 mg IM18 BF <sub>4</sub> /kg dw soil | 1000 mg IM18 BF <sub>4</sub> /kg dw soil |
|----------------------------------------|-----------------------------------------|-----------------------------------------|------------------------------------------|
| Lufa versus 30 % K / 70 % S            | <b>&gt; 0.0001</b>                      | <b>&gt; 0.0001</b>                      | 0.601                                    |
| Lufa versus 50 % K / 50 % S            | <b>&gt; 0.0001</b>                      | <b>&gt; 0.0001</b>                      | 1.000                                    |
| Lufa versus 30 % K / 70 % S            | <b>&gt; 0.0001</b>                      | 0.156                                   | 1.000                                    |
| 30 % K / 70 % S versus 50 % K / 50 % S | <b>0.001</b>                            | <b>&gt; 0.0001</b>                      | 0.239                                    |
| 30 % K / 70 % S versus 70 % K / 30 % S | 0.228                                   | <b>&gt; 0.0001</b>                      | 0.199                                    |
| 50 % K / 50 % S versus 70 % K / 30 % S | <b>&gt; 0.0001</b>                      | <b>&gt; 0.0001</b>                      | 1.000                                    |

**Table 4:** Overview on the ANOVA - results using the Bonferroni multiple comparisons (SPSS Version 12), comparison of the different soil types for IM14 BF<sub>4</sub> in the growth inhibition assay with *Lepidium sativum*; significant results are printed in bold.

|                           | 100 mg IM14 BF <sub>4</sub> /kg dw soil | 500 mg IM14 BF <sub>4</sub> /kg dw soil | 1000 mg IM14 BF <sub>4</sub> /kg dw soil |
|---------------------------|-----------------------------------------|-----------------------------------------|------------------------------------------|
| Lufa versus 5 % Corg      | 1.000                                   | <b>0.001</b>                            | <b>0.017</b>                             |
| Lufa versus 10 % Corg     | 1.000                                   | <b>&gt; 0.0001</b>                      | <b>0.002</b>                             |
| 5 % Corg versus 10 % Corg | 1.000                                   | 0.581                                   | 0.273                                    |

**Table 5:** Overview on the ANOVA - results using the Bonferroni multiple comparisons (SPSS Version 12), comparison of the different soil types for IM18 BF<sub>4</sub> in the growth inhibition assay with *Lepidium sativum*; significant results are printed in bold.

|                           | 100 mg IM18 BF <sub>4</sub> /kg dw soil | 500 mg IM18 BF <sub>4</sub> /kg dw soil | 1000 mg IM18 BF <sub>4</sub> /kg dw soil |
|---------------------------|-----------------------------------------|-----------------------------------------|------------------------------------------|
| Lufa versus 5 % Corg      | <b>&gt; 0.0001</b>                      | <b>0.018</b>                            | <b>&gt; 0.0001</b>                       |
| Lufa versus 10 % Corg     | <b>&gt; 0.0001</b>                      | <b>&gt; 0.0001</b>                      | <b>&gt; 0.0001</b>                       |
| 5 % Corg versus 10 % Corg | <b>0.005</b>                            | 0.006                                   | <b>&gt; 0.0001</b>                       |

**Table 6:** Overview on the ANOVA - results using the Bonferroni multiple comparisons (SPSS Version 12), comparison of the different soil types for IM14 BF<sub>4</sub> in the growth inhibition assay with *Triticium aestivum*; significant results are printed in bold.

|                           | 100 mg IM14 BF <sub>4</sub> /kg dw soil | 500 mg IM14 BF <sub>4</sub> /kg dw soil | 1000 mg IM14 BF <sub>4</sub> /kg dw soil |
|---------------------------|-----------------------------------------|-----------------------------------------|------------------------------------------|
| Lufa versus 5 % Corg      | 0.055                                   | <b>0.002</b>                            | <b>0.001</b>                             |
| Lufa versus 10 % Corg     | <b>&gt; 0.0001</b>                      | <b>&gt; 0.0001</b>                      | <b>&gt; 0.0001</b>                       |
| 5 % Corg versus 10 % Corg | <b>&gt; 0.0001</b>                      | <b>0.004</b>                            | <b>0.029</b>                             |

**Table 7:** Overview on the ANOVA - results using the Bonferroni multiple comparisons (SPSS Version 12), comparison of the different soil types for IM18 BF<sub>4</sub> in the growth inhibition assay with *Triticium aestivum*; significant results are printed in bold.

|                           | 100 mg IM18 BF <sub>4</sub> /kg dw soil | 500 mg IM18 BF <sub>4</sub> /kg dw soil | 1000 mg IM18 BF <sub>4</sub> /kg dw soil |
|---------------------------|-----------------------------------------|-----------------------------------------|------------------------------------------|
| Lufa versus 5 % Corg      | <b>&gt; 0.0001</b>                      | <b>0.001</b>                            | <b>0.011</b>                             |
| Lufa versus 10 % Corg     | <b>&gt; 0.0001</b>                      | <b>&gt; 0.0001</b>                      | <b>&gt; 0.0001</b>                       |
| 5 % Corg versus 10 % Corg | 0.111                                   | <b>&gt; 0.0001</b>                      | <b>0.001</b>                             |

**Table 8:** Overview on the calculated ratio relating the influence of the soil parameters clay and organic matter on the toxic effects to the observed growth inhibition in the reference soil Lufa 2.2 expressed in [% growth inhibition] in comparison to Lufa 2.2

|                      |                       | Lufa with 10 %<br>clay<br>(+kaolinite) | Lufa with 15 %<br>clay<br>(+kaolinite) | Lufa with 10 %<br>clay<br>(+smectite) | Lufa with 15 %<br>clay<br>(+smectite) | Lufa with 5 %<br>Corg | Lufa with 5 %<br>Corg |
|----------------------|-----------------------|----------------------------------------|----------------------------------------|---------------------------------------|---------------------------------------|-----------------------|-----------------------|
| IM14 BF <sub>4</sub> | 1000 mg/kg dw<br>soil | 83                                     | 89                                     | 88                                    | 99                                    | 52                    | 28                    |
|                      | 500 mg/kg dw<br>soil  | 73                                     | 85                                     | 85                                    | 31                                    | 50                    | 10                    |
|                      | 100 mg/kg dw<br>soil  | 43                                     | 110                                    | 43                                    | 43                                    | 67                    | -19                   |
| IM18 BF <sub>4</sub> | 1000 mg/kg dw<br>soil | 108                                    | 102                                    | 68                                    | n.d.                                  | 91                    | 78                    |
|                      | 500 mg/kg dw<br>soil  | 105                                    | 105                                    | 12                                    | n.d.                                  | 79                    | 46                    |
|                      | 100 mg/kg dw<br>soil  | 22                                     | 17                                     | 14                                    | n.d.                                  | 2                     | 19                    |
